# Supplementary material for: 13C- and 15N-Labeling Strategies Combined with Mass Spectrometry Comprehensively Quantify Phospholipid Dynamics in C. elegans
Source: PubMed Central journal article supplement (PMC4631354; doi:10.1371/journal.pone.0141850), 2015-11-03
Supplement: pone.0141850.s003.pdf [file pone.0141850.s003.pdf]

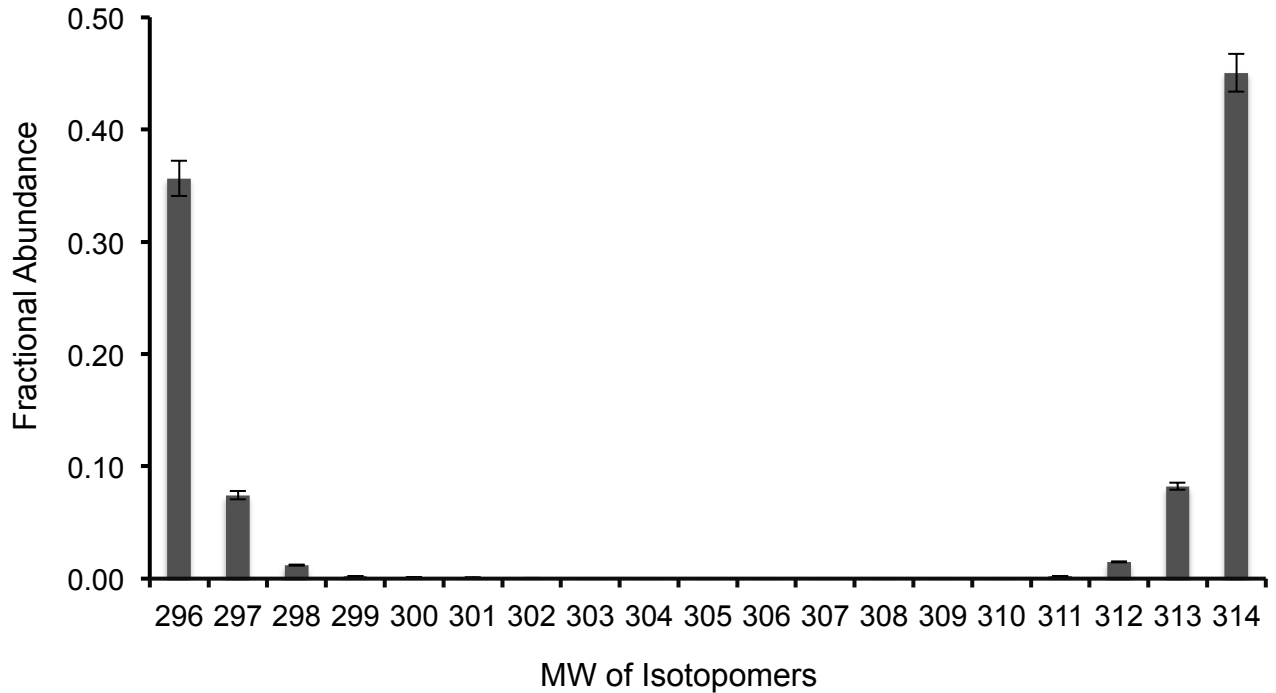

**S1 Fig. Stable Isotope Labeling of *E. coli* Diet.** The isotopomer distribution from the  $^{12}\text{C}:^{13}\text{C}$  bacterial mixture demonstrates that there is no mixing of individual carbons between the unlabeled and stable isotope-labeled bacteria as there are no significant isotopomers between the molecular weights (MW) of 299 and 311. The exact ratio of the  $^{12}\text{C}:^{13}\text{C}$  diet is determined for each experiment by comparing the abundance of the exclusively  $^{13}\text{C}$  peaks (MW: 312-314) to the  $^{12}\text{C}$  peaks (MW: 296-298). Data from 18 experiments with SEM shown.
