# Supplementary material for: 13C- and 15N-Labeling Strategies Combined with Mass Spectrometry Comprehensively Quantify Phospholipid Dynamics in C. elegans
Source: PubMed Central journal article supplement (PMC4631354; doi:10.1371/journal.pone.0141850), 2015-11-03
Supplement: pone.0141850.s006.pdf [file pone.0141850.s006.pdf]

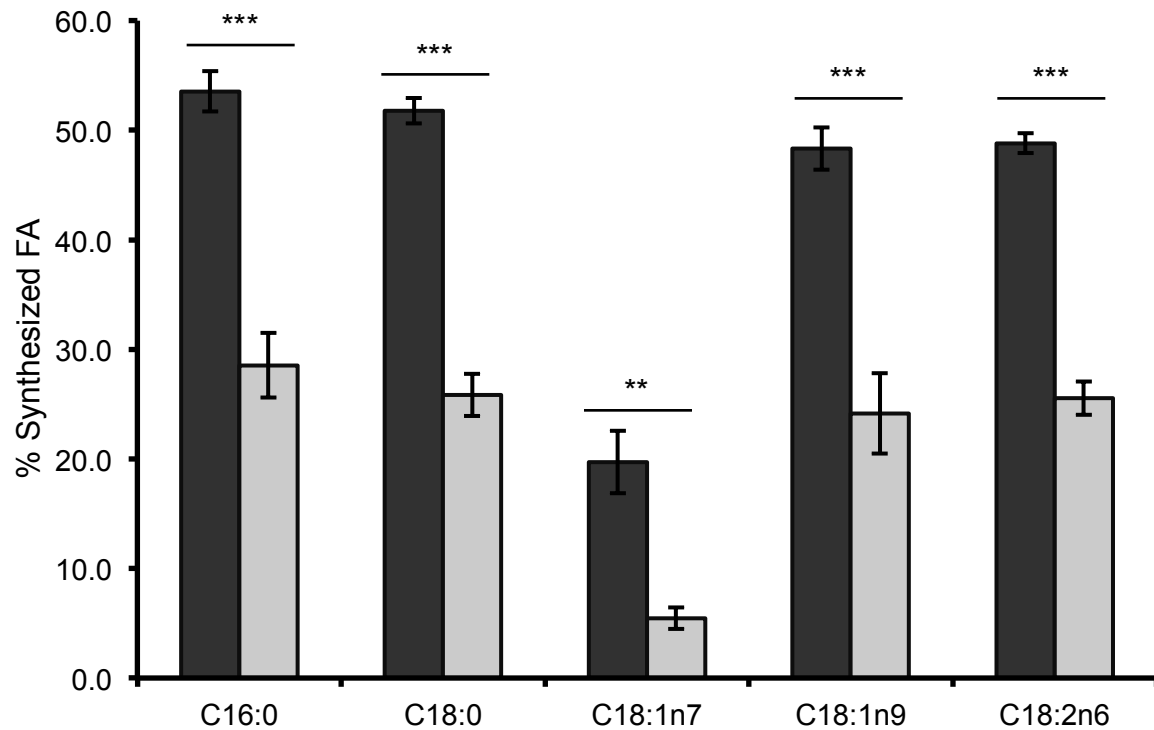

**S4 Fig. Reduced Fatty Acid Synthesis in *pod-2* RNAi Treated Animals.** The relative amount of synthesized fatty acid is reduced with *pod-2* (gray) RNAi treatment compared to control RNAi (black). This significant decrease demonstrates the effectiveness of the short-term adult-only RNAi and confirms our ability to measure synthesis with a 6-hour labeling period. Numbers shown represent the mean  $\pm$  SEM, n=5. Statistical significance was defined by t-tests (\*\*p<0.01, \*\*\*p<0.001).
