# Supplementary material for: 13C- and 15N-Labeling Strategies Combined with Mass Spectrometry Comprehensively Quantify Phospholipid Dynamics in C. elegans
Source: PubMed Central journal article supplement (PMC4631354; doi:10.1371/journal.pone.0141850), 2015-11-03
Supplement: pone.0141850.s009.pdf [file pone.0141850.s009.pdf]

A.

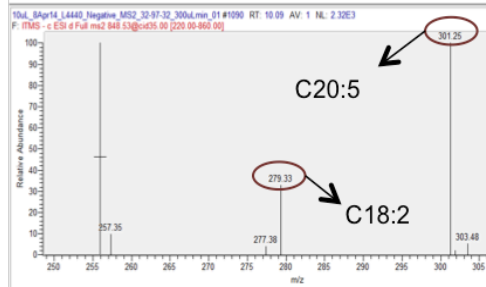

B.

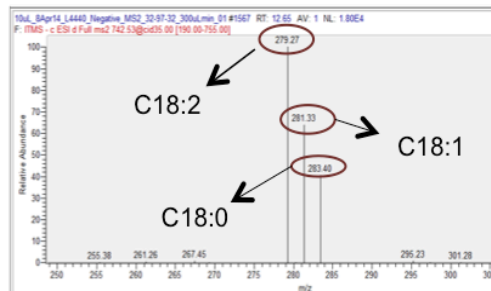

C.

| Species            | Control RNAi                                       | <i>fat-7</i> RNAi                                  |
|--------------------|----------------------------------------------------|----------------------------------------------------|
| <b>PtdCho 35:2</b> | (18:2/17:0)60%<br>(18:1/17:1)25%<br>(20:2/15:0)15% | (18:1/17:1)90%<br>(19:1/16:1)10%                   |
| <b>PtdCho 36:2</b> | (18:1/18:1)70%<br>(19:1/17:1)30%                   | (18:1/18:1)70%<br>(18:0/18:2)30%                   |
| <b>PtdCho 36:3</b> | (18:2/18:1)70%<br>(20:3/16:0)25%<br>(18:3/18:0)5%  | (18:3/18:0)60%<br>(18:2/18:1)30%<br>(20:3/16:0)10% |
| <b>PtdCho 38:5</b> | (20:4/18:1)70%<br>(20:5/18:0)30%                   | (20:5/18:0)85%<br>(20:4/18:1)15%                   |
| <b>PtdCho 38:6</b> | (20:5/18:1)100%                                    | (20:5/18:1)100%                                    |
| <b>PtdCho 38:7</b> | (20:5/18:2) 100%                                   | (20:5/18:2)90%<br>(20:4/18:3)10%                   |
| <b>PtdCho 40:8</b> | (20:5/20:3)60%<br>(20:4/20:4)40%                   | (20:5/20:3)65%<br>(20:4/20:4)35%                   |
| <b>PtdCho 40:9</b> | (20:5/20:4)100%                                    | (20:5/20:4)100%                                    |
| <b>PtdEtn 35:2</b> | (18:2/17:0)60%<br>(18:1/17:1)25%<br>(20:2/15:0)15% | (18:1/17:1)90%<br>(19:1/16:1)10%                   |
| <b>PtdEtn 36:2</b> | (18:1/18:1)30%<br>(18:2/18:0)70%                   | (18:1/18:1)40%<br>(18:0/18:2)60%                   |
| <b>PtdEtn 37:5</b> | (20:5/17:0)100%                                    | (20:5/17:0)100%                                    |
| <b>PtdEtn 38:5</b> | (20:5/18:0)100%                                    | (20:5/18:0)100%                                    |

**S7 Fig. Assessment of Fatty Acid Tail Composition by LC-MS/MS.** (A) Mass spectra can be used to identify the fatty acid tails associated with a given phospholipid population using the S2 scan from the LC-MS/MS analysis. For example, phosphatidylcholine (PtdCho) 38:7 shows the mass of two fragments (279.33, 301.25) indicating that the species consists of a C18:2 and a C20:5 fatty acid tail. (B) The MS2 scan of phosphatidylethanolamine (PtdEtn) 36:2 population reveals two different species. Fragment masses 279.27, 281.33, and 283.40 correspond to fatty acid tails C18:2, C18:1, and C18:0. The MS2 scan shows that the PtdEtn 36:2 consists of one molecule with two C18:1 tails and another with C18:0 and C18:2 tails. (C) Table specifying fatty acid tail breakdown estimates for each listed PL species for both control RNAi and *fat-7* RNAi.
