# Supplementary material for: 13C- and 15N-Labeling Strategies Combined with Mass Spectrometry Comprehensively Quantify Phospholipid Dynamics in C. elegans
Source: PubMed Central journal article supplement (PMC4631354; doi:10.1371/journal.pone.0141850), 2015-11-03
Supplement: pone.0141850.s011.pdf [file pone.0141850.s011.pdf]

| FA Species   | Control (I4440) |            | fat-7 RNAi |            |
|--------------|-----------------|------------|------------|------------|
|              | PL              | NL         | PL         | NL         |
| C14:0        | <2%             | 3.6 ± 0.2  | <2%        | 3.7 ± 0.2  |
| C16:0        | 5.7 ± 0.3       | 6.7 ± 0.5  | 4.1 ± 0.2  | 6.5 ± 0.5  |
| C18:0        | 8.0 ± 0.5       | 4.1 ± 0.2  | 16.0 ± 0.6 | 13.8 ± 1.1 |
| Total SFA    | 14.9            | 14.4       | 20.9       | 23.9       |
| C16:1n7      | 2.0 ± 0.1       | 5.8 ± 0.2  | 2.4 ± 0.1  | 5.9 ± 0.3  |
| C18:1n9      | 4.5 ± 0.1       | 11.3 ± 0.2 | <2%        | 3.8 ± 0.6  |
| C18:1n7      | 20.3 ± 0.6      | 18.4 ± 0.4 | 21.9 ± 0.7 | 17.1 ± 1.0 |
| Total MUFA   | 26.9            | 35.5       | 25.4       | 26.8       |
| C18:2n6      | 10.0 ± 0.3      | 7.5 ± 0.2  | 4.3 ± 0.5  | 4.1 ± 0.3  |
| C20:3n6      | 4.9 ± 0.2       | <2%        | 2.9 ± 0.1  | <2%        |
| C20:4n6      | 3.8 ± 0.2       | <2%        | 2.5 ± 0.2  | <2%        |
| C20:4n3      | 5.3 ± 0.2       | <2%        | 4.9 ± 0.4  | <2%        |
| C20:5n3      | 19.4 ± 0.3      | 4.4 ± 0.2  | 24.9 ± 0.7 | 4.0 ± 0.2  |
| Total MUFA   | 43.5            | 15.1       | 39.4       | 9.7        |
| C15iso       | 2.3 ± 0.1       | 6.5 ± 0.5  | <2%        | 7.5 ± 0.6  |
| C17iso       | 4.3 ± 0.5       | 6.4 ± 0.7  | 3.3 ± 0.4  | 6.6 ± 0.7  |
| Total mmBCFA | 6.7             | 12.9       | 5.1        | 14.1       |
| C17D         | 3.5 ± 0.2       | 15.9 ± 0.4 | 4.7 ± 0.3  | 18.7 ± 0.7 |
| C19D         | <2%             | 5.1 ± 0.2  | 2.4 ± 0.2  | 5.5 ± 0.4  |
| Total CFA    | 5.3             | 21.0       | 7.2        | 24.2       |

**S1 Table. Fatty Acid Tail Composition of day 3 *fem-1;fer-15* on RNAi.** The relative abundance (%) of each fatty acid species of purified phospholipid (PL) and neutral lipid (NL) tails measured by gas chromatography. Data is presented as the average of 5 independent experiments ± SEM.
